# Supplementary material
Source: Springer Nature journal article supplement (https://www.springermedizin.de/resource/supplementary/12993_2011_389_MOESM2_ESM.pdf/9617680)

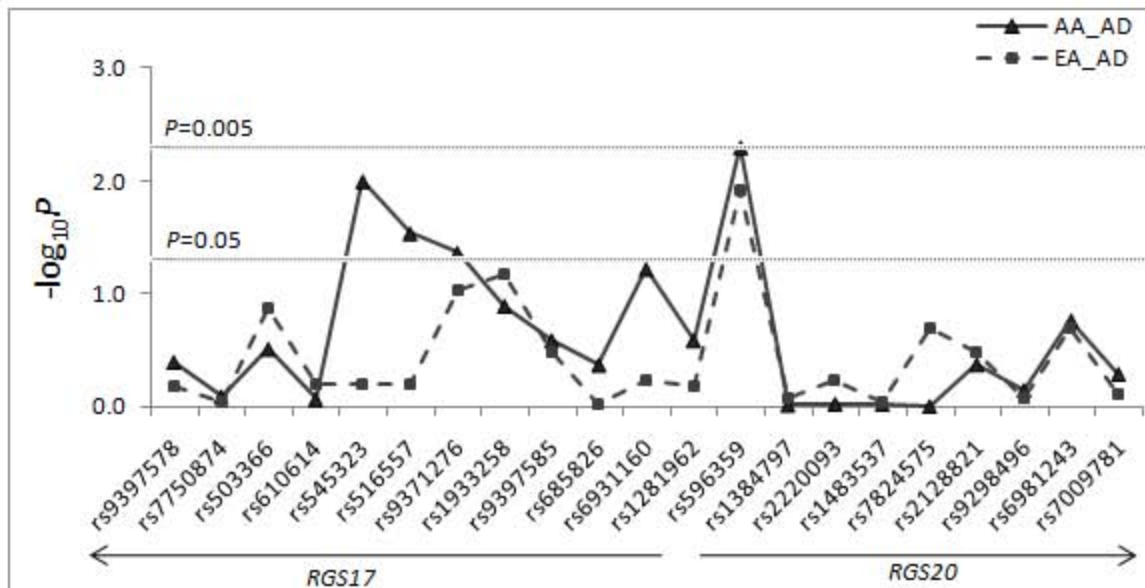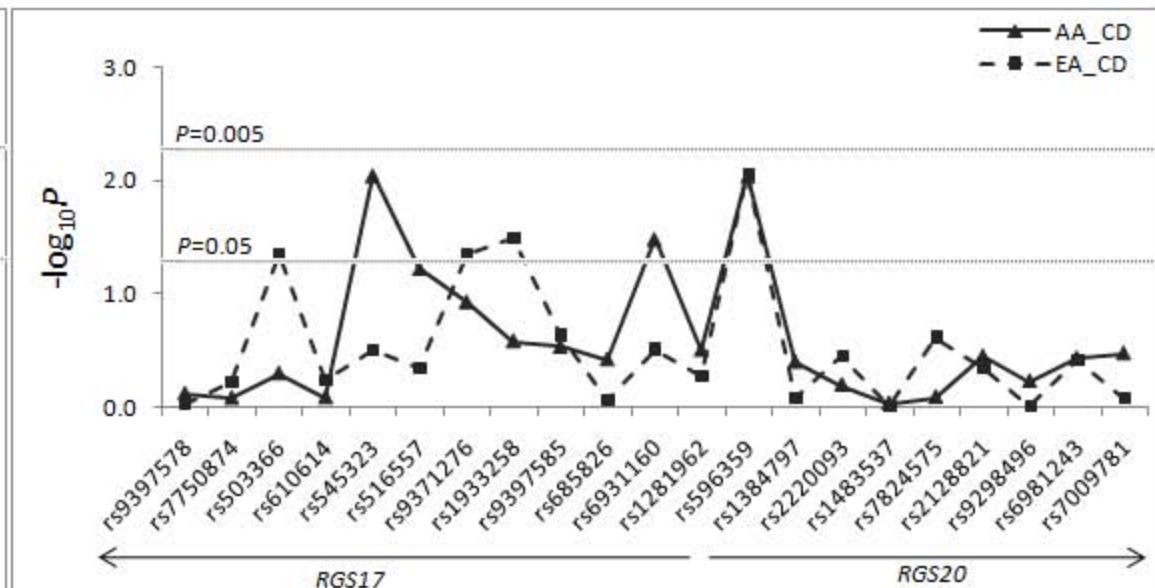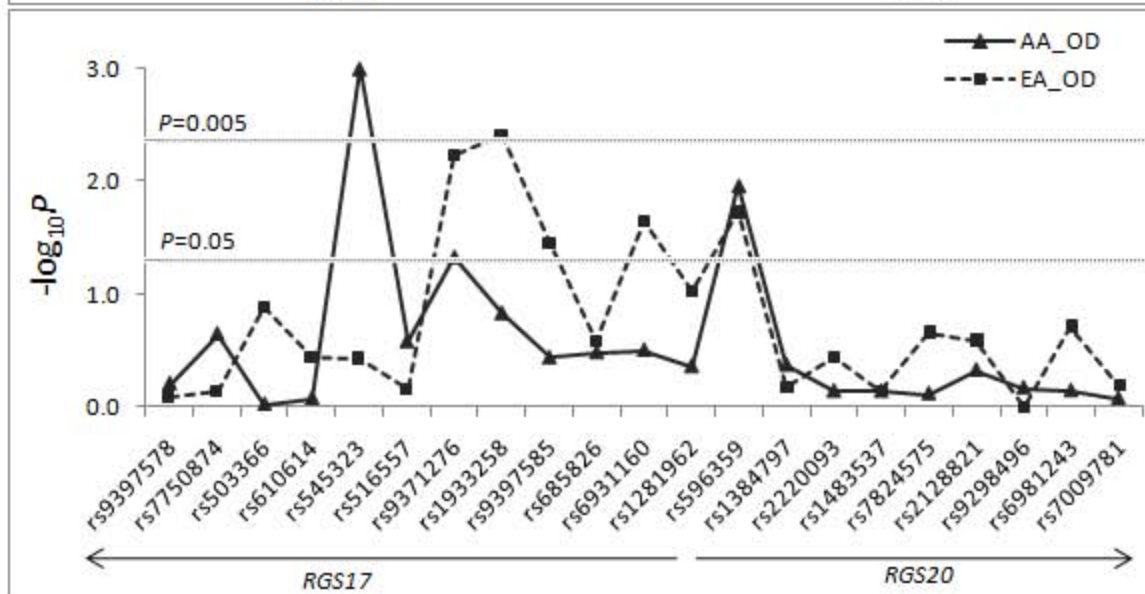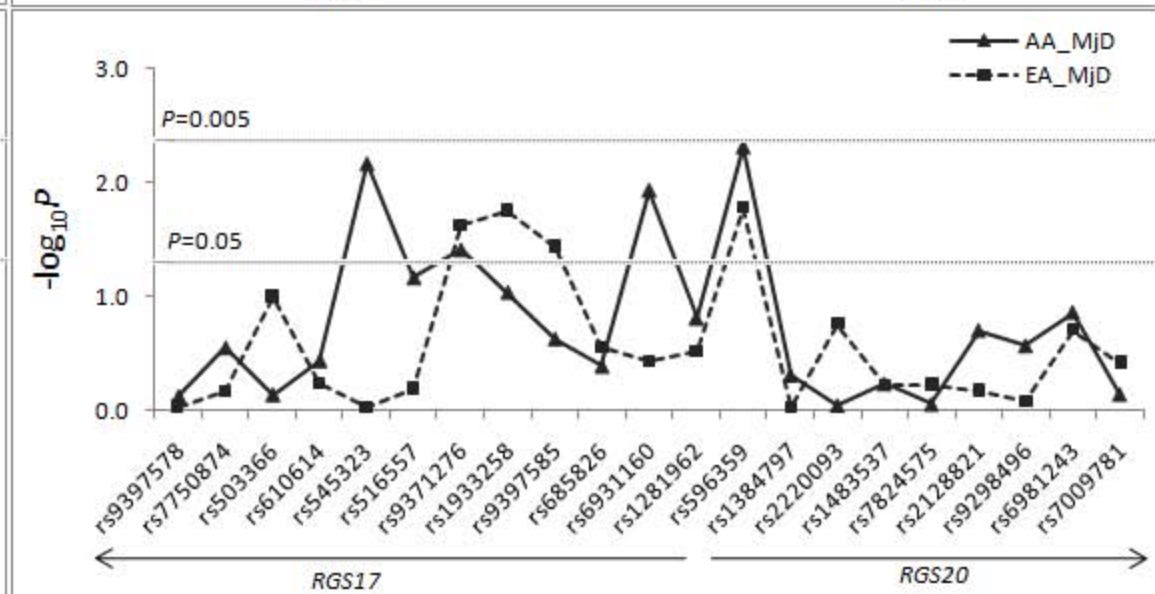

Supplement: MOESM2 [file 9617680]
